1 **Metformin protects trabecular meshwork against oxidative injury via**  
2 **activating integrin/ROCK signals**

3  
4 Lijuan Xu, Xinyao Zhang, Yin Zhao, Yang Cao, Yuanbo Liang \*

5  
6 **Author Affiliations:**

7 National Clinical Research Center for Ocular Diseases; The Eye Hospital of Wenzhou  
8 Medical University; Glaucoma Research Institute of Wenzhou Medical University,  
9 Zhejiang, China

10 \* **Corresponding Author:** Yuanbo Liang, PhD

11 National Clinical Research Center for Ocular Diseases; The Eye Hospital of Wenzhou  
12 Medical University; Glaucoma Research Institute of Wenzhou Medical University,  
13 Wenzhou 325027, Zhejiang, China

14 **E-mail address:** [yuanboliang@126.com](mailto:yuanboliang@126.com)  
15

16 **Abstract:**

17 **Background:** This study aimed to investigate the protective effect of metformin on  
18 the trabecular meshwork (TM) and explore its molecular mechanisms *in vivo* and *in*  
19 *vitro*.

20 **Methods:** Ocular hypertension (OHT) mouse models were induced with  
21 dexamethasone (DEX) and further treated with metformin to determine its IOP  
22 lowering effect. Cultured human TM cells (HTMC) were pre-stimulated with  
23 tert-butyl hydroperoxide (tBHP) to induce oxidative damage and then supplemented  
24 with metformin for another 24 h. The expression of fibrotic markers and  
25 integrin/ROCK signals, including  $\alpha$ -SMA, TGF- $\beta$ , fibronectin, F-actin, integrin beta 1,  
26 Rho-associated kinase (ROCK)1/2, AMP-activated protein kinase (AMPK), myosin  
27 light chain 1 (MLC 1), and F-actin were determined by western blotting (WB) and  
28 immunofluorescence (IF). Reactive oxygen species (ROS) content was analysed using  
29 flow cytometry (FCM).

30 **Results:** Administration of metformin reduced the elevated IOP and alleviated the  
31 fibrotic activity of aqueous humour outflow in OHT models. Additionally, metformin  
32 rearranged the disordered cytoskeleton in the TM both *in vivo* and *in vitro*.  
33 Furthermore, metformin significantly inhibited ROS production and activated  
34 integrin/ROCK signalling induced by tBHP in HTMC.

35 **Conclusion:** Metformin reduced the elevated IOP in steroid-induced OHT mouse  
36 models and exerted its protective effects against oxidative injury by regulating  
37 cytoskeleton remodelling through the integrin/ROCK pathway. This study provides  
38 new insights into metformin use and preclinical evidence for the potential treatment of  
39 primary open-angle glaucoma.

40 **Keywords:** primary open-angle glaucoma, trabecular meshwork, cytoskeleton  
41 remodelling, metformin

42 **Funding:** This work was supported by the Key R&D Program of Zhejiang  
43 (2022C03112), Leading Scientific and Technological Innovation Talents in Zhejiang  
44 Province (2021R52012), National Key R&D Program of China (2020YFC2008200),  
45 Zhejiang Provincial National Science Foundation of China (LQ18H120010), Key

46 Innovation and Guidance Program of the Eye Hospital, School of Ophthalmology &  
 47 Optometry, Wenzhou Medical University (YNZD 2201903), and the Wenzhou  
 48 Municipal Technological Innovation Program of High-level Talents (No.  
 49 604090352/577).

50

51

## 52 Introduction

53 Intraocular pressure (IOP) elevation, predominantly resulting from increased  
54 resistance to aqueous humour outflow (AHO), is a major risk factor for primary  
55 open-angle glaucoma (POAG) deterioration (Casson, *et al.*,2012; Wu, *et al.*,2020).  
56 The only proven method is IOP lowering (Richter and Coleman,2016). According to  
57 Bill and his colleagues (Bill and Hellsing,1965; Bill and Svedbergh,1972), up to 80%  
58 aqueous humour is drained via conventional trabecular meshwork (TM) pathway;  
59 however, the available anti-glaucoma medications mostly act on sites other than TM  
60 and have limited efficiency. Therefore, polypharmacy has become increasingly  
61 prevalent, coupled with an increasing economic burden on society and patients (Wu, *et*  
62 *al.*,2020).

63 IOP elevation is associated with TM stiffness (Alvarado, *et al.*,1984; Heijl, *et*  
64 *al.*,2002; Johnstone, *et al.*,2021). Theoretically, TM-targeting drugs are potentially  
65 effective in lowering IOP caused by diseased TM. Integrin and Rho-associated protein  
66 kinase (ROCK) play pivotal roles in cytoskeleton formation and maintenance (Tan, *et*  
67 *al.*,2020; Yemanyi, *et al.*,2020) and ROCK inhibitor (ROCKi) can decrease  
68 actomyosin contraction and actin crosslinking (Liu, *et al.*,2021). ROCKi is the only  
69 drug that directly targets conventional outflow function (Aga, *et al.*,2008; Rao, *et*  
70 *al.*,2001; Ren, *et al.*,2016). It alters the architecture of AHO and expands the  
71 juxtacanalicular connective tissue region. Currently, the clinically available ROCKi  
72 include Y-27632 and ripasudil. However, the costs of Y-27632 and ripasudil are as  
73 high as 300 \$ (2.5 mL) and 209 \$ (5 mL), respectively. Moreover, they have not yet  
74 been approved for use in China. Considering that China is a developing country with  
75 the largest population in the world, it is urgent to explore novel TM-targeting drugs  
76 with characteristics of efficiency and lower prices, which are appropriate for our  
77 nation.

78 Metformin (MET), an oral biguanide insulin-sensitising drug, is the most widely  
79 used treatment for type 2 diabetes mellitus (DM) (Foretz, *et al.*,2014). It is a  
80 multifunctional drug (Rangarajan, *et al.*,2018; Zhao, *et al.*,2021). Recent studies by  
81 Lin *et al.* (Lin, *et al.*,2015) and Maleskic *et al.* (Maleskic, *et al.*,2017) found that

metformin reduced the risk of open-angle glaucoma (OAG) in patients with DM, and this effect persisted even after controlling for glycated haemoglobin. However, this effect was not observed with other hypoglycaemic medications (insulin, sulfonylureas, thiazolidinediones, and meglitinides), suggesting that the protective effect of MET on glaucoma goes beyond glycaemic improvement. However, the precise mechanisms involved remain unclear.

Excessive reactive oxygen species (ROS) in TM play an important role in the disruption of cytoskeletal integrity and apoptosis (*Hu, et al.,2017*), leading to pathological alterations in AHO and subsequent IOP rise (*Babizhayev and Bunin,1989; Sacca, et al.,2016*). To investigate the role of metformin in damaged TM cells and ocular hypertension (OHT) mouse models, we used tert-butyl hydroperoxide (tBHP) to induce oxidative damage in TM cells (*Tang, et al.,2013; Wang, et al.,2021*) and topical glucocorticoids to create OHT mouse models (*Li, et al.,2021*). The results showed that metformin protected against cytoskeletal destruction in TM by enhancing the integrin/ROCK pathway and alleviated elevated IOP in steroid-induced OHT mouse models.

## Results

### *Steroid-induced OHT in mouse*

A steroid-induced OHT mouse model was successfully established in this study. The baseline IOP did not differ between DEX-treated and PBS vehicle eyes; however, starting at day 10, IOP was significantly elevated in DEX treated eyes ( $p < 0.05$ , Figure 1A) and stabilised at day 21. There were no significant differences in the initial and final levels of body weight (BW) between the two groups (Figure 1B). Approximately 87.5% DEX-treated eyes had elevated IOP after 21 days of steroid induction with the averaged increased magnitude of  $2.73 \pm 2.21$  mmHg (0.3–6 mmHg). Moreover, the fibrotic markers ( $\alpha$ -SMA and TGF- $\beta$ ) were obviously overexpressed in the OHT animal models ( $p < 0.05$ , Figure 1D-F).

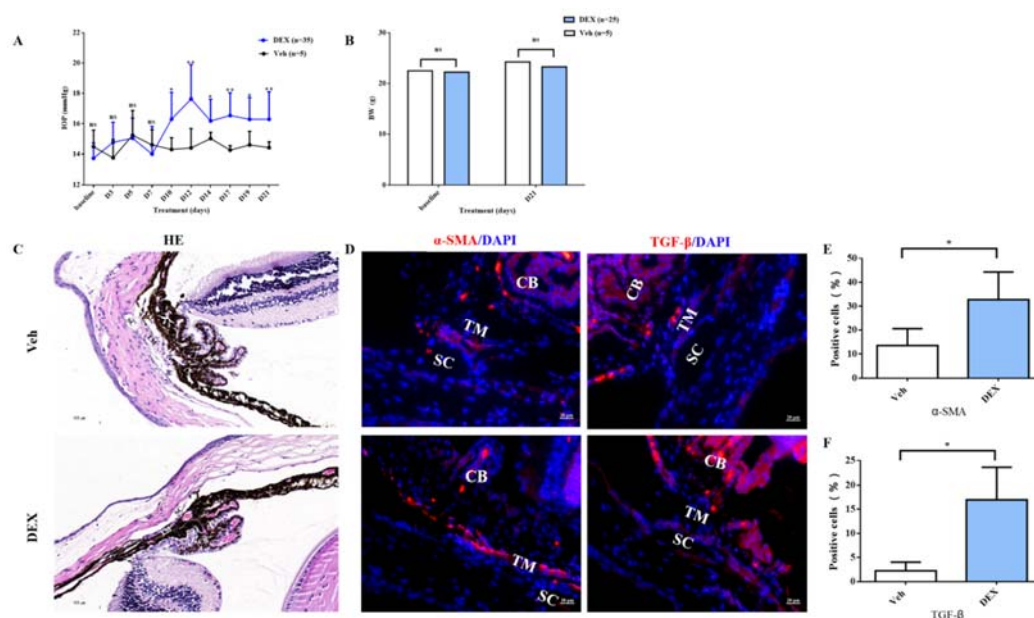

**Figure 1.** Topical ocular DEX induced OHT in mice. A. Elevated IOP in DEX-treated C57BL/6J mice was induced significantly at 3 weeks ( $p < 0.01$ ). B. There was no significant change in the body weight of the DEX-treated group ( $p > 0.05$ ). C. HE staining of OHT models. D.  $\alpha$ -SMA and TGF- $\beta$  staining in the representative OHT models. E-F. Quantification of  $\alpha$ -SMA and TGF- $\beta$  of the models.  $*p < 0.05$ , ns: non-significance, TM: trabecular meshwork, SC: Schlemm's canal, CB: ciliary body.

# **Metformin effectively reversed steroid-induced OHT in mouse**

To test the drug's IOP lowering effect, successfully induced OHT mouse models were randomly assigned to three groups according to different treatments for an additional 21 days consecutively: PBS eye drop (group 1), 0.3% MET eye drop (group 2), and MET oral groups (group 3). Eye drops were prescribed twice daily, whereas in group 3, a certain amount of MET for each mouse was dissolved in daily drinking water.

The experimental procedure is illustrated in Figure 2A. The IOPs after 21 days of steroid induction in all three OHT groups were similar ( $16.67 \pm 2.28$ ,  $16.62 \pm 0.81$ , and  $15.05 \pm 0.88$  mmHg, respectively). After five days of MET treatment, IOPs was significantly reduced in both groups 2 and 3 ( $p < 0.01$ , Figure 2B). In fact, metformin almost completely reversed steroid-induced OHT, returning IOP to near baseline levels on day 5 in group 3 and on day 10 in group 2, suggesting a therapeutic role of metformin in OAG. Specific IOP values are shown in Figure 2B.

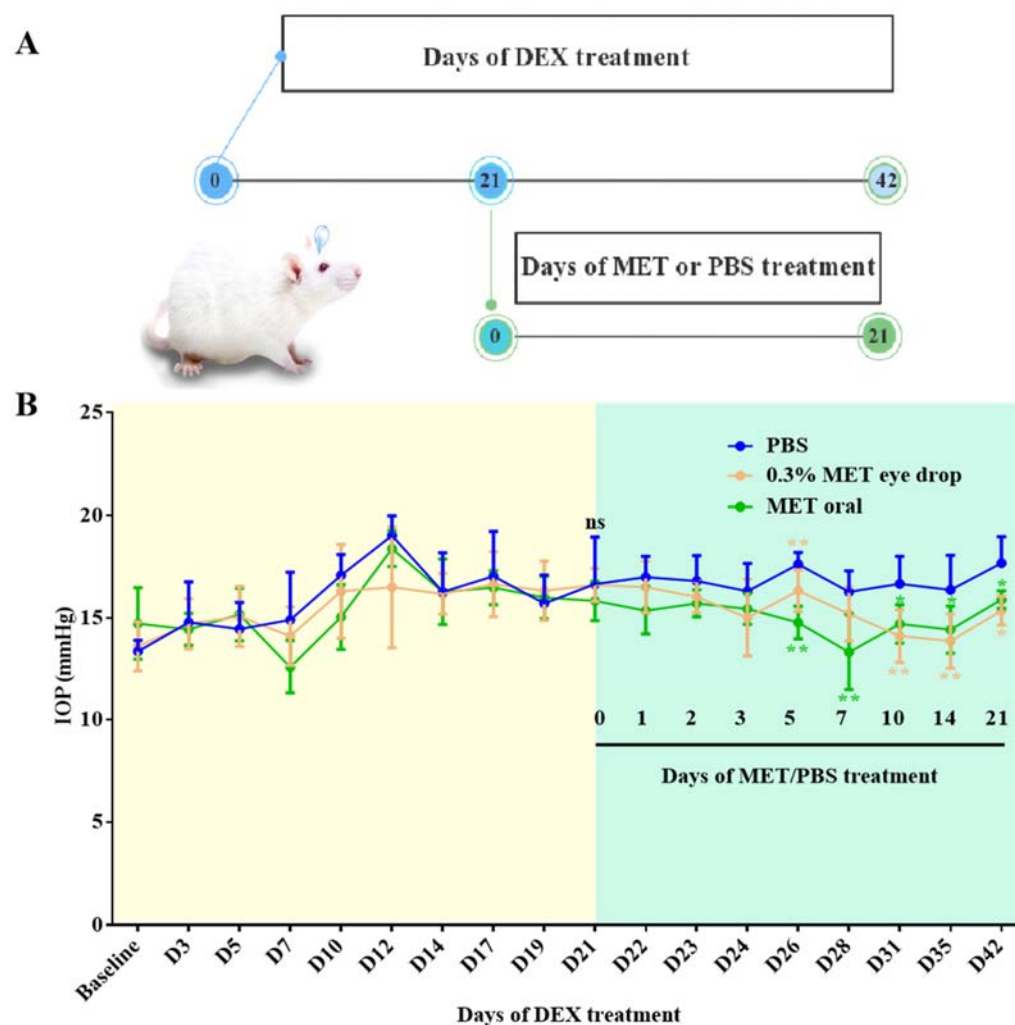

**Figure 2.** Effect of metformin (MET) on OHT mice model. A. Experimental process overview. B. MET effectively reversed the IOP in steroid-induced OHT mice models. \* $p < 0.05$ , \*\* $p < 0.01$ , ns: non-significance.

# **Metformin attenuated the steroid-induced TM cytoskeleton damages in vivo**

As shown in Figure 3, metformin, both eye drops and oral intake, improved fibrosis and the intensity of phalloidin labelling of F-actin in TM tissue in steroid-induced OHT C57BL/6 mice (Figure 3A-B). Quantitative comparison showed a significant difference in the number of  $\alpha$ -SMA-, TGF- $\beta$ -, and fibronectin (FN)-positive TM cells between MET-treated and control mice in a time-dependent manner (Figure 3C-J). Although not statistically significant, metformin treatment promoted the cytoskeleton recovery of steroid-induced TM cell damage, as confirmed by the upregulation of



142 F-actin. We concluded that the IOP-lowering effect of metformin in this steroid OHT  
143 model can be largely explained by the attenuation of fibrotic alterations and  
144 rearrangement of the cell skeleton at sites of TM or trabecular outflow pathways.

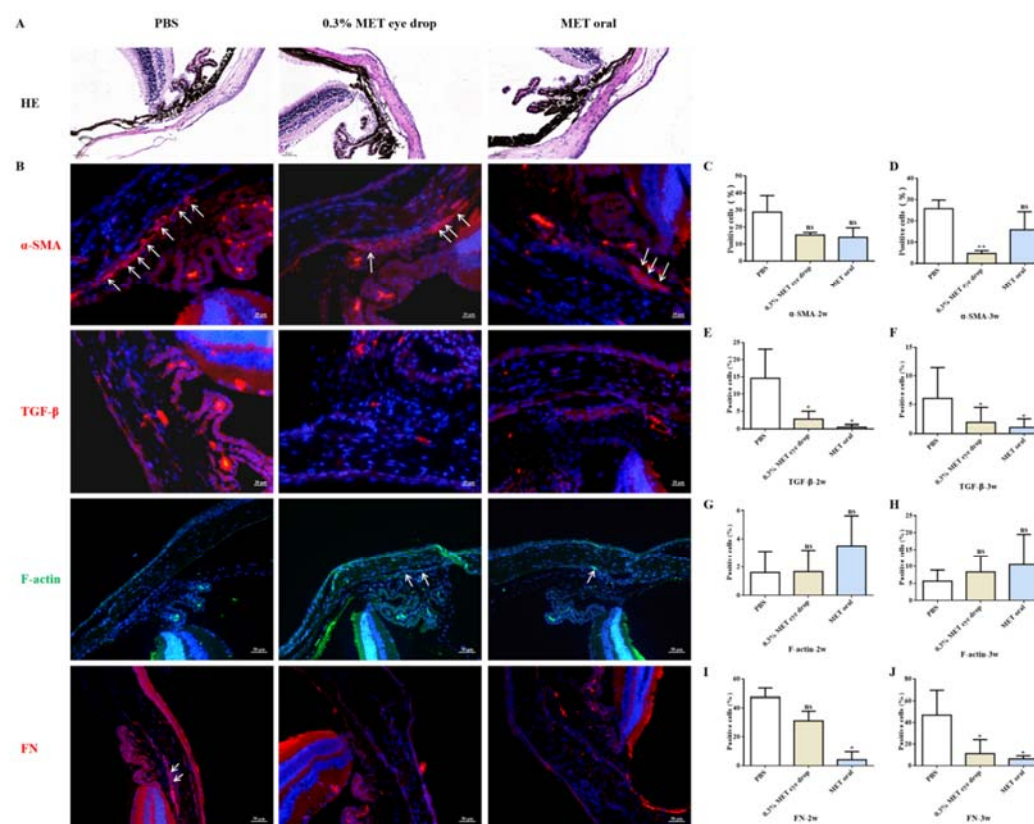

145 **Figure 3.** MET decreased the expression of fibrotic markers in steroid-induced  
146 trabecular meshwork stiffening in mice. A-B. Representative images of HE (A) and  
147 fibrotic markers (B). C-D. Quantification of α-SMA of the models after 2 weeks (C)  
148 and 3 weeks (D) of MET treatment. E-F. Quantification of TGF-β of the models after  
149 2 weeks (E) and 3 weeks (F) of MET treatment. G-H. Quantification of F-actin of the  
150 models after 2 weeks (G) and 3 weeks (H) of MET treatment. I-J. Quantification of  
151 fibronectin (FN) of the models after 2 weeks (I) and 3 weeks (J) of MET treatment. \**p*  
152 < 0.05, \*\**p* < 0.01, ns: non-significance. White arrows indicate the representative  
153 positive cells.

#### 154 **Protection effects of metformin on TM *in vitro***

155 To test the effect of metformin on TM *in vitro*, we performed studies on HTMC. WB  
156 showed that the expression of myocilin, a glucocorticoid-inducible gene in the HTMC,



increased after DEX treatment (Figure 4B), confirming that the cells had characteristics of trabecular meshwork cells.

Higher doses ( $\geq 10$  mM) of metformin decreased the number of HTMC, but this inhibitory effect was not evident at lower doses ( $< 10$  mM) (Figure 4C). To verify the protective role of metformin in HTMC, cells were pre-treated with 100  $\mu$ M tBHP for 1 h to induce chronic oxidative stress (Tang, *et al.*, 2013), and subsequently exposed to low doses of metformin (3, 5, and 10 mM) (shortened as L-MET in this study). The results showed that L-MET significantly reversed the inhibitory effect induced by tBHP (Figure 4A, 4D).

Furthermore, cells treated with L-MET showed less intracellular ROS signals compared to the control, and 1 mM metformin reduced tBHP-induced ROS production. These results were confirmed by FCM analysis (Figure 4E-F). These results indicate that metformin reversed oxidative damage to HTMC.

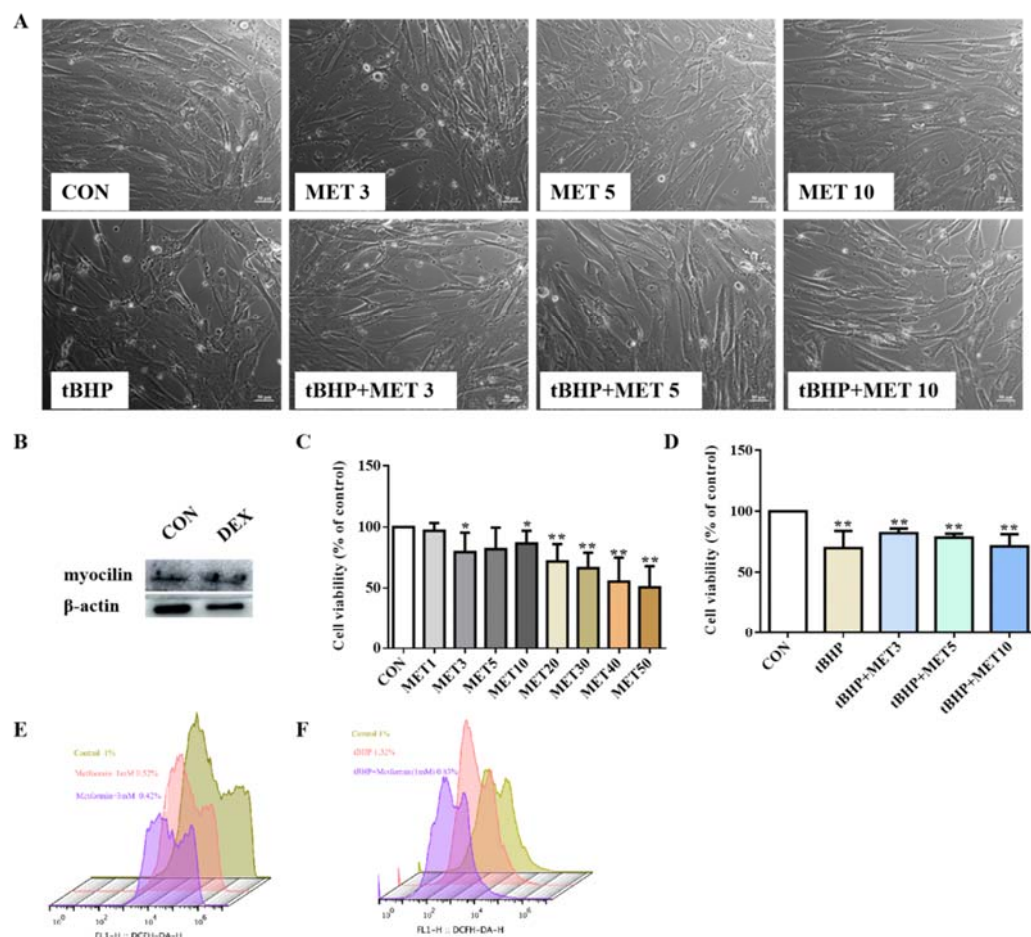

**Figure 4.** Low dose of metformin reversed the disarranged morphology of HTMC. A. HTMC were treated with metformin for 24 h with or without pre-treatment of tBHP for 1 h. Representative images of cell distribution and morphology photographed by inverted microscopy. B. The expression of myocilin after DEX treatment in HTMC. C-D. The relative HTMC viability after exposure to MET with different concentrations. Cell proliferation was measured using the CCK8 assay. E-F. The relative ROS levels were assayed via FCM and the results showed that metformin reduced the ROS production of HTMC induced by tBHP.  $**p < 0.01$ .  $*p < 0.05$ . *Metformin restored the tBHP induced cytoskeleton destruction in HTMC and activated integrin/ROCK signals*

Actin filaments play key roles in cortical polarisation and asymmetric spindle localisation during phagocytosis in HTMC. F-actin was stained to determine whether actin dynamics were involved in tBHP-induced cellular dysfunction. As shown in Figure 5A, F-actin was evenly accumulated in the cytoplasm with a robust fluorescent signal in control HTMC. Exposure to L-MET did not change the morphology of HTMC as observed by inverted phase-contrast microscopy. Contrarily, HTMCs exposed to 1 h-tBHP displayed intermittent distribution of actin filaments with faded fluorescent signals. Additionally, tBHP treatment significantly destroyed HTMC, manifesting as various morphology-aberrant cells with misaligned cytoplasm. These pathological changes could be partially rescued by L-MET, implying that metformin could restore the dynamic instability from oxidative damage. Furthermore, WB results (Figure 5B-C) showed that L-MET significantly activated the integrin/ROCK pathway by upregulating integrin, ROCK, pAMPK, and F-actin, and it was more pronounced in the 3 mM and 5 mM doses.

The ultrastructures of HTMC were examined by transmission electron microscope (TEM) (Figure 6). We observed a significant reduction in the amount and density of microfilaments in the tBHP treated cells and these changes were recovered after L-MET treatment.

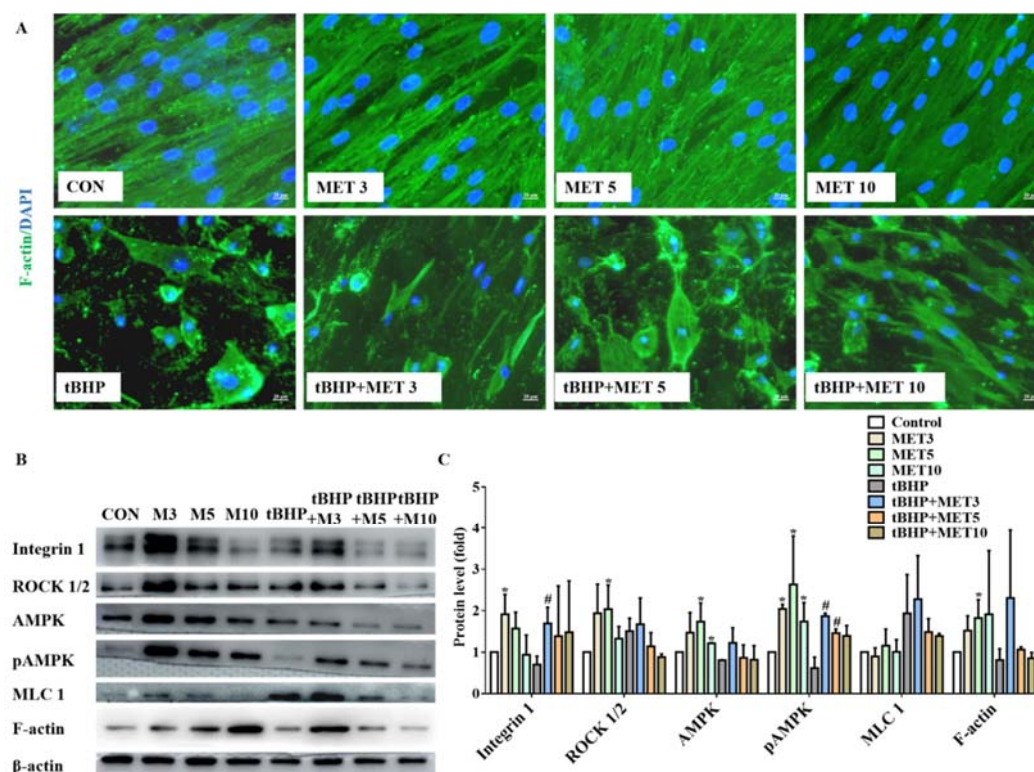

**Figure 5.** Metformin promoted the recovery of tBHP-induced cytoskeleton damages (A) and activated integrin/ROCK pathway (B) in HTMC. C. The quantitative protein levels of B. \*  $p < 0.05$  (comparison with the control), #  $p < 0.05$  (comparison with the tBHP treated group).

216

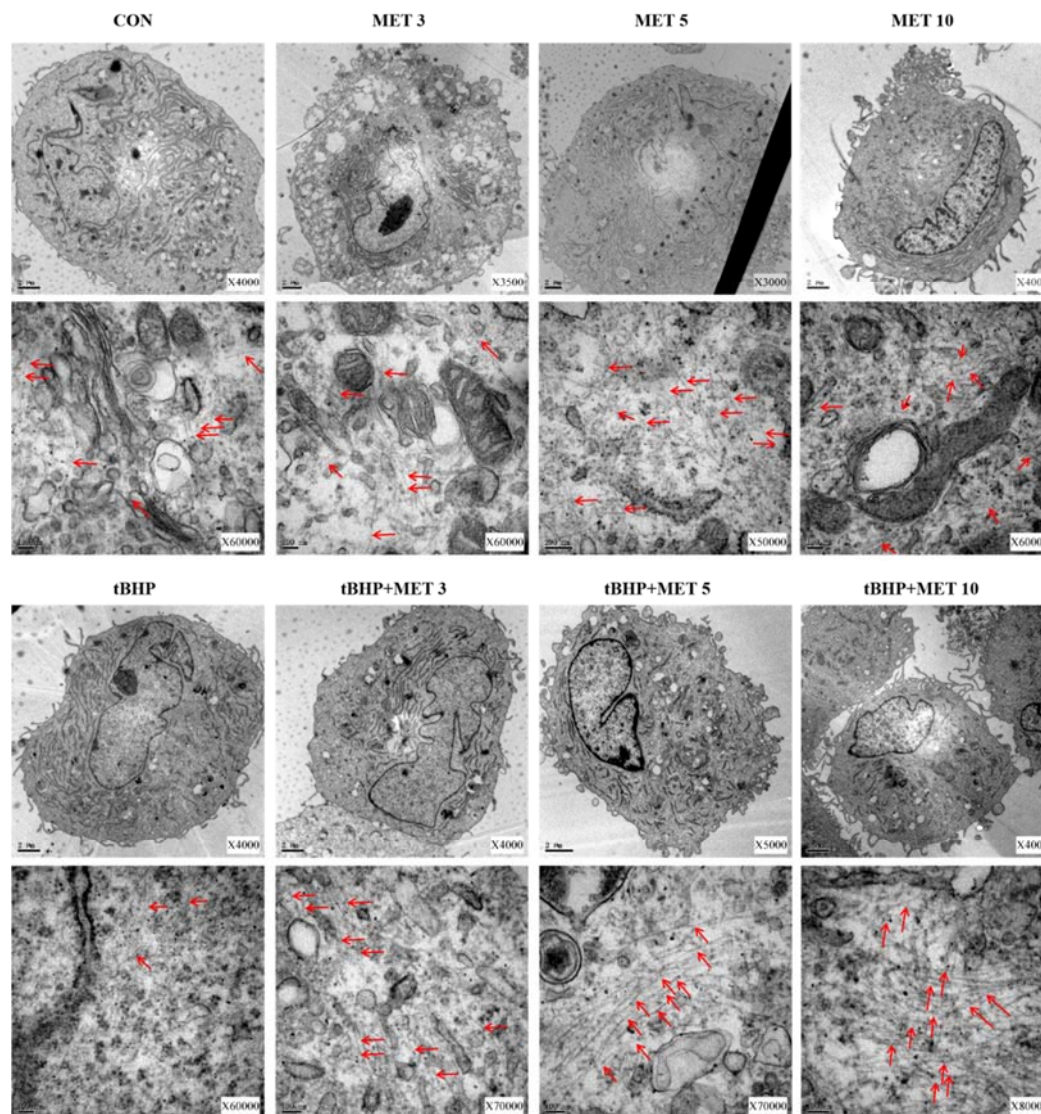

217 **Figure 6.** Metformin partially normalized the damaged microfilaments of HTMC  
 218 induced by tBHP. Red arrows indicate the representative microfilaments imaged by  
 219 TEM.

## 220 Discussion

221 The major observations of the current study were the three significant phenotypic  
 222 changes induced by metformin in OHT mouse eyes and HTMC. The first was the IOP  
 223 lowering effect in steroid-induced OHT mouse eyes. The second was a reversal of the  
 224 skeletal destruction of TM cells, both *in vivo* and *in vitro*. Third, there was a  
 225 significant decrease in the accumulation of fibrotic markers, namely  $\alpha$ -SMA, TGF- $\beta$ ,



226 and fibronectin, in TM tissues. These results suggest a protective effect of metformin  
227 in TM, probably via promoting cytoskeleton recovery through the integrin/ROCK  
228 pathway.

229 Steroid-induced OHT in mice was generated (Wang, *et al.*,2018) with the  
230 characteristics of TM stiffening and elevated IOP (Li, *et al.*,2019). In line with  
231 previous studies (Clark, *et al.*,2001; Johnson, *et al.*,1997; Johnson, *et al.*,1990), our  
232 model suggested that the stiffness of AHO closely matched that of OAG in humans,  
233 including the deposition of ECM in the TM, disordered cytoskeleton, increased AHO  
234 resistance, and elevated IOP. Similar to the study by Zode *et al.*, (Zode, *et al.*,2014) our  
235 topical DEX elevated the IOP by 0.3–6 mmHg after 3 weeks of induction.

236 TM tissues play an important role in the regulation of AHO function and IOP  
237 (Wang, *et al.*,2018). TM cells have the properties of extracellular debris phagocytosis  
238 and ECM degradation. If these functions are disturbed, the balance of TM in keeping  
239 AHO free of obstructive debris is disrupted (Last, *et al.*,2011). It is noteworthy that  
240 metformin appeared to restore TM biomechanical properties in our steroid-induced  
241 OHT model after 5 days of treatment, and this restoration was accompanied by  
242 significant downregulation of ECM proteins in TM.

243 Moreover, as evidenced by IF and WB analyses, L-MET rearranged the  
244 disordered cytoskeleton of HTMC. This finding was supported by a study conducted  
245 by Li *et al.* (Li, *et al.*,2020), who showed that 50  $\mu$ M metformin protected oocytes  
246 against cytoskeleton destruction. Interestingly, the time course of structural changes in  
247 the TM was consistent with the observed pharmacodynamics of metformin on IOP,  
248 significantly decreasing 2 and 3 weeks of OHT because of MET treatment, which was  
249 consistent with the known effects of other ROCK regulators (Lin, *et al.*,2018;  
250 McMurtry, *et al.*,2010). Taken together, our results indicate that L-MET promotes the  
251 regeneration of abnormal HTMC and enables the recovery of TM function; this  
252 should be confirmed in future studies.

253 As confirmed by WB analysis, complementation with L-MET treatment  
254 upregulated integrin, pAMPK, ROCK, and F-actin signals. These *in vitro* findings  
255 indicate that metformin might elicit its protective effects through the regulation of the

256 integrin/ROCK pathway in HTMC. The *in vivo* observations in the OHT model again  
257 support the importance of the integrin/ROCK pathway in TM tissue protection.  
258 Generally, these signals mediate cellular biomechanical tension through actomyosin  
259 cytoskeletal tension, ECM synthesis, assembly, and degradation (*Nakajima, et*  
260 *al.,2005; Pattabiraman and Rao,2010; Rao, et al.,2001*).

261 Inconsistent with the previous studies indicating that the AMPK activator  
262 suppressed ROCK activity, our study revealed a novel mechanism of metformin  
263 action within which activation of both AMPK and ROCK signals sequentially  
264 upregulated F-actin expression in TM. We hypothesised that ROCK regulators might  
265 protect TM via different mechanisms, either by inhibiting ROCK signals when  
266 increased AHO resistance is attributed to TM stiffness or by activating the ROCK  
267 pathway to promote cytoskeleton formation when it is damaged. In the current study,  
268 we presumed that metformin lowered IOP through short-term changes in TM cell  
269 morphology and adhesion by regulating integrin/ROCK signalling. In addition,  
270 recovery to normal IOP prevents further TM cell loss, whereas metformin promotes  
271 the maintenance of cytoskeleton morphology and repair after injury; therefore, IOP is  
272 maintained at a normal level for an extended period.

273 Generally, these data emphasise the protective properties of metformin in the  
274 conventional outflow pathway, consistent with a large body of literature on other  
275 tissues (*Rangarajan, et al.,2018; Yi, et al.,2021; Zhao, et al.,2021*). In addition to  
276 metformin-mediated changes in ECM turnover, the observed changes in ECM  
277 composition and amount may also be due to the metformin-mediated opening of flow  
278 pathways and the consequential removal of ECM. Additionally, the observed  
279 reduction in ROS content in HTMC treated with L-MET was in line with earlier  
280 studies displaying its protective effect in several kinds of cells (*Ghasemnejad-Berenji,*  
281 *et al.,2018; Huang, et al.,2015; Loudon, et al.,2014*). In any case, therapy for  
282 steroid-induced OHT, which inhibits the cycle of damage and promotes cell  
283 remodelling by restoring function to a diseased tissue, offers a potential benefit for  
284 patients.

285 In summary, promotion of TM cytoskeleton recovery by metformin treatment

286 may be an underlying mechanism for IOP reduction and AH outflow increase. A  
 287 thorough investigation of the mechanisms by which cytoskeletal recovery is promoted  
 288 will improve our understanding of the therapeutic mechanism of metformin. If  
 289 metformin is confirmed to promote damaged cytoskeleton recovery and maintenance  
 290 in the human body, it may have clear therapeutic effects on the main sites of glaucoma  
 291 pathogenesis, which will broaden their application in the field of glaucoma. In  
 292 conclusion, we revealed that integrin/ROCK activation reprograms metabolism in TM  
 293 cells by enhancing the cytoskeleton and downregulating excessive ECM proteins.

## 294 **Materials and methods**

| Reagent type<br>(species) or<br>resource       | Designation   | Source or<br>reference                                                                      | Identifiers | Additional<br>information                                                                    |
|------------------------------------------------|---------------|---------------------------------------------------------------------------------------------|-------------|----------------------------------------------------------------------------------------------|
| Strain,<br>strain background<br>(Mus musculus) | C57BL/6J      | Zhejiang Vital River Experimental<br>Animal Technology Co. LTD<br>(Charles River lab China) |             |                                                                                              |
| Cell culture                                   | HTMC          | BNCC(Shanghai, China)                                                                       | 338506      |                                                                                              |
| Commercial assay<br>or kit                     | CCK8 kit      | APE BIO                                                                                     |             |                                                                                              |
| Commercial assay<br>or kit                     | DCFH-DA probe | Beyotime Biotechnology, Shanghai,<br>China                                                  |             |                                                                                              |
| Drug                                           | Dexamethasone | Shanghai Macklin Biochemical Co.,<br>Ltd, China                                             |             | Cell:500 nM;<br>Animal:0.1%                                                                  |
| Drug                                           | Metformin     | Sigma-Aldrich, St. Louis, USA                                                               |             | Cell:0, 1, 3, 5,<br>10, 20, 30, 40,<br>and 50 mM;<br>Animal:0.3%,<br>7.5 µg/day<br>per mouse |
| Drug                                           | tBHP          | Damas-beta, China                                                                           |             | Cell:100 µM                                                                                  |



|          |                                                                             |       |          |                          |
|----------|-----------------------------------------------------------------------------|-------|----------|--------------------------|
| Antibody | Anti-myocilin((rabbit monoclonal)                                           | Abcam | 41552    | WB(1:1000)               |
| Antibody | Anti-integrin 1(rabbit monoclonal )                                         | Abcam | Ab179471 | WB(1:1000)               |
| Antibody | Anti-AMPK(rabbit monoclonal )                                               | CST   | 2795T    | WB(1:1000)               |
| Antibody | Anti-pAMPK(rabbit monoclonal)                                               | CST   | 2535T    | WB(1:1000)               |
| Antibody | Anti-ROCK1/2(rabbit monoclonal)                                             | Abcam | 45171    | WB(1:1000)               |
| Antibody | Anti-MLC1(rabbit monoclonal )                                               | Abcam | Ab186436 | WB(1:1000)               |
| Antibody | Anti-F-actin(mouse monoclonal )                                             | Abcam | Ab130935 | WB(1:1000)<br>IF (1:500) |
| Antibody | Anti-β-Actin(mouse monoclonal)                                              | CST   | 3700S    | WB(1:1000)               |
| Antibody | Anti-α-SMA(rabbit monoclonal)                                               | CST   | 19245    | IF(1:500)                |
| Antibody | Anti-TGF-β(rabbit monoclonal)                                               | Abcam | 215715   | IF(1:500)                |
| Antibody | Anti-fibronectin(rabbit monoclonal)                                         | Abcam | Ab268020 | IF(1:500)                |
| Antibody | Anti-Rabbit IgG H&L,F(ab') <sub>2</sub> Fragment(Alexa Fluor 594 Conjugate) | CST   | 8889S    | IF(1:500)                |
| Antibody | Anti-Mouse IgG H&L,F(ab') <sub>2</sub> Fragment(Alexa Fluor 488 Conjugate)  | CST   | 4408S    | IF(1:500)                |
| Antibody | Anti-mouse IgG,                                                             | CST   | 7076S    | WB(1:10000)              |

|                        |                                         |                                                         |                  |             |
|------------------------|-----------------------------------------|---------------------------------------------------------|------------------|-------------|
|                        | HRP-linked Antibody                     |                                                         |                  |             |
| Antibody               | Anti-rabbit IgG,<br>HRP-linked Antibody | CST                                                     | 7074S            | WB(1:10000) |
| Other                  | DAPI                                    | Beyotime Institute of Biotechnology,<br>Shanghai, China |                  | IF(1:500)   |
| Software,<br>algorithm | SPSS software                           | SPSS software                                           | Version<br>22.0  |             |
| Software,<br>algorithm | GraphPad Prism                          | GraphPad Software                                       | Version 7.0      |             |
| Software,<br>algorithm | ImageJ                                  | National Institutes of Health, USA                      | Version<br>1.52a |             |

295

## 296 *Animals*

297 All the animals were treated in accordance with the principles of the Declaration of  
298 Helsinki and in compliance with the Association for Research in Vision and  
299 Ophthalmology (ARVO) Statement. All experiments were approved by the  
300 Institutional Animal Care and Use Committee of the Wenzhou Medical University  
301 (wydw2022-0209). Healthy C57BL/6J mice (age: 6–8 weeks, male) were used in this  
302 study. The mice were purchased from Zhejiang Vital River Experimental Animal  
303 Technology Co. LTD (Charles River lab China), bred/housed in clear cages, and kept  
304 in housing rooms at 21°C with a 12 h:12 h light: dark cycle.

## 305 *OHT animal model and drug treatments*

306 The animal experiments were performed in two consecutive steps. In the first step,  
307 OHT C57BL/6J mouse model was induced by topical 0.1% dexamethasone phosphate  
308 (DEX) twice daily (8–9 AM and 5–6 PM) as described previously (*Li, et al.,2021*) and  
309 sterile phosphate buffer saline (PBS) was used as a vehicle control. The second step  
310 was conducted 3 weeks after steroid induction. The successfully created OHT mice  
311 models with elevated IOP were randomly divided into three groups: control (PBS eye  
312 drops, twice daily), 0.3% MET eye drops (twice daily), and MET oral groups (7.5

313 µg/day for each mouse). In this step, the mice received an additional 3 weeks of  
314 supplemented drug delivery.

### 315 ***IOP measurements***

316 Briefly, mice were anaesthetised using gaseous isoflurane (approximately 2 min) and  
317 topical alcaine (Alcon-couvreur n. v, Rijksweg, Puurs Belgium). IOP was measured  
318 using a rebound tonometer (icare TONOVET; Vantaa, Finland). Each recorded IOP  
319 was the average of five measurements and three IOP readings were recorded for the  
320 same eye to calculate the mean value. IOP measurements were conducted every 2–3  
321 days (Monday, Wednesday, and Friday, between 2 PM and 3 PM).

### 322 ***Weight Measurement***

323 The anaesthetised mice were gently placed on digital electronic scales (Electronic  
324 Scale, Kunshan, China) to measure their weight. The effective reading of body weight  
325 (BW) was recorded to an accuracy of 0.01 g. The BW of each mouse was calculated  
326 from the average of the three test values.

### 327 ***Cell culture and treatment***

328 Human TM cells (HTMC) were purchased from BNCC (338506, Shanghai, China)  
329 and cultured in DMEM/F12 medium (Cytiva, HyClone Laboratories, Logan, Utah,)   
330 containing 10% foetal bovine serum (FBS, BI, USA) and antibiotics (100 U/mL  
331 penicillin and 100 µg/mL streptomycin, Gibco, Life Technologies Corporation, NY,  
332 USA) at 37°C and 5% CO<sub>2</sub>. To identify the characteristics of HTMC, cells were  
333 treated with 500 nM dexamethasone (DEX) (Shanghai Macklin Biochemical Co., Ltd,  
334 China) for 7 days, and the expression of myocilin was evaluated by western blotting  
335 (WB) (He, et al., 2019). For drug testing, tBHP (Damas-beta, China) and metformin  
336 (Sigma-Aldrich, St. Louis, USA) were dissolved in DMEM/F12. HTMC were  
337 pre-treated with tBHP solution for 1 h to induce oxidative damage, followed by 24-h  
338 incubation in normal culture medium containing metformin at certain concentrations.

### 339 ***Cell viability***

340 Cell viability was measured using the CCK8 assay kit (APE BIO), following the  
341 manufacturer's instructions. The cells were seeded in 96-well plates and exposed to  
342 increasing concentrations of metformin (0, 1, 3, 5, 10, 20, 30, 40, and 50 mM) for 24

h. The cell viability was determined by measuring the optical density at 490 nm using an absorbance microplate reader (SpectraMax 190; version 7.1.0, Molecular Devices, California, USA).

# ***Detection of intracellular reactive oxygen species levels***

Intracellular ROS levels were determined using a 2',7'-dichlorofluorescein diacetate (DCFH-DA) probe (Beyotime Biotechnology, Shanghai, China) according to the manufacturer's instructions and a previous study (Xu, *et al.*,2020). The values were normalised to signals from the control group.

# ***Western blotting***

Cells were lysed 24 h after drug treatment as previously described (Xu, *et al.*,2020). After gel separation and membrane transfer, myocilin (Abcam), integrin 1 (Abcam), AMPK (CST), pAMPK (CST), ROCK1/2 (Abcam), MLC1 (Abcam), and F-actin (Abcam) were detected.  $\beta$ -Actin (CST) was used as the loading control. Western blot membranes were developed using a chemiluminescence detection system (Amersham Imager 680RGE; GE Healthcare Bio-Sciences AB, Sweden, Japan).

# ***Histology, immunostaining and transmission electron microscope (TEM)***

At the time of harvest, the mice were re-anesthetized, and the eyes were fixed in 4% paraformaldehyde overnight, embedded in paraffin or optimum cutting temperature compound in sagittal axis. The sections were incubated overnight with primary antibodies at 4°C according to the manufacturers' instructions (Xu, *et al.*,2020). $\alpha$ -SMA (CST), TGF- $\beta$  (Abcam), F-actin (Abcam), fibronectin (Abcam) were detected. The secondary antibodies were goat anti-rabbit or anti-mouse (CST) at a 1:500 dilution. Sections were subsequently incubated with 2-(4-Amidinophenyl)-6-indolecarbamide dihydrochloride (DAPI, Beyotime Institute of Biotechnology, Shanghai, China) for 5 min to stain the nuclei, washed, and then mounted.

The cells were fixed with 4% paraformaldehyde for 15 min, permeabilised with 0.25% Triton X-100 for 20 min, and blocked with 5% bovine serum albumin for 1 h at room temperature. After blocking, they were incubated overnight with primary antibodies at 4°C. The next day, the cells were rinsed and incubated with secondary

antibodies conjugated to Alexa Fluor (CST) for 1 h at room temperature. Fluorescent images were obtained using a confocal microscope (X-Cite Series 120, Lumen Dynamics Group Inc., Canada).

For electron microscopy studies, cells was fixed in 2.5% glutaraldehyde (Shanghai Macklin Biochemical Co., Ltd, China) and embedded in Epon resin and 80 nm sagittal thin sections were cut through iridocorneal tissues using an ultramicrotome (Power Tome-XL, RMC Products, USA). Sections were stained with uranylacetate/lead citrate and examined with a transmission electron microscope (HITACHI, H-7500).

### ***Image analysis***

Immunohistochemical images were obtained using a microscope (ECLIPSE 80i, Nikon) and analysed using the NIS-Elements Imaging Software (3.22.00; Build 700, LO, USA). For quantification, high-power fields (400× magnification) of the AHO from each model were captured. ImageJ (v1.52a, National Institutes of Health, USA) was used to quantify the positively stained cells.

### ***Statistical analysis***

Data analysis was conducted using SPSS (version 22.0) software and GraphPad Prism (version 7.0). Cell-based and animal-based experiments included at least three biological replicates. Continuous data are summarised as mean±standard deviation. The Student's t-test and ANOVA were used to test the differences in continuous variables. A paired t-test was used to compare IOP changes from the baseline. Statistical significance was set at  $p$  value < 0.05.

**Financial Disclosures:** The authors indicate no financial conflicts of interest.

### **Data availability:**

All data generated or analysed during this study are included in the manuscript and supporting files. Source data files have been provided for Figures 1, 2, 3, 4 and 5.

## **References:**

Aga M, Bradley JM, Keller KE, Kelley MJ, Acott TS. 2008. Specialized podosome- or invadopodia-like

structures (PILS) for focal trabecular meshwork extracellular matrix turnover. *Invest Ophthalmol Vis Sci* **49**:5353-5365. doi:10.1167/iovs.07-1666

Alvarado J, Murphy C, Juster R. 1984. Trabecular meshwork cellularity in primary open-angle glaucoma and nonglaucomatous normals. *OPHTHALMOLOGY* **91**:564-579. doi:10.1016/s0161-6420(84)34248-8

Babizhayev MA, Bunin A. 1989. Lipid peroxidation in open-angle glaucoma. *Acta Ophthalmol (Copenh)* **67**:371-377. doi:10.1111/j.1755-3768.1989.tb01617.x

Bill A, Hellsing K. 1965. Production and drainage of aqueous humor in the cynomolgus monkey (*Macaca irus*). *Invest Ophthalmol* **4**:920-926.

Bill A, Svedbergh B. 1972. Scanning electron microscopic studies of the trabecular meshwork and the canal of Schlemm--an attempt to localize the main resistance to outflow of aqueous humor in man. *Acta Ophthalmol (Copenh)* **50**:295-320. doi:10.1111/j.1755-3768.1972.tb05954.x

Casson RJ, Chidlow G, Wood JP, Crowston JG, Goldberg I. 2012. Definition of glaucoma: clinical and experimental concepts. *CLIN EXP OPTHALMOL* **40**:341-349. doi:10.1111/j.1442-9071.2012.02773.x

Clark AF, Steely HT, Dickerson JJ, English-Wright S, Stropki K, McCartney MD, Jacobson N, Shepard AR, Clark JJ, Matsushima H, Peskind ER, Leverenz JB, Wilkinson CW, Swiderski RE, Fingert JH, Sheffield VC, Stone EM. 2001. Glucocorticoid induction of the glaucoma gene MYOC in human and monkey trabecular meshwork cells and tissues. *Invest Ophthalmol Vis Sci* **42**:1769-1780.

Foretz M, Guigas B, Bertrand L, Pollak M, Viollet B. 2014. Metformin: from mechanisms of action to therapies. *CELL METAB* **20**:953-966. doi:10.1016/j.cmet.2014.09.018

Ghasemnejad-Berenji M, Ghazi-Khansari M, Yazdani I, Nobakht M, Abdollahi A, Ghasemnejad-Berenji H, Mohajer AJ, Pashapour S, Dehpour AR. 2018. Effect of metformin on germ cell-specific apoptosis, oxidative stress and epididymal sperm quality after testicular torsion/detorsion in rats. *ANDROLOGIA* **50**doi:10.1111/and.12846

He JN, Zhang SD, Qu Y, Wang HL, Tham CC, Pang CP, Chu WK. 2019. Rapamycin Removes Damaged Mitochondria and Protects Human Trabecular Meshwork (TM-1) Cells from Chronic Oxidative Stress. *MOL NEUROBIOL* **56**:6586-6593. doi:10.1007/s12035-019-1559-5

Heijl A, Leske MC, Bengtsson B, Hyman L, Bengtsson B, Hussein M. 2002. Reduction of intraocular pressure and glaucoma progression: results from the Early Manifest Glaucoma Trial. *Arch Ophthalmol* **120**:1268-1279. doi:10.1001/archophth.120.10.1268

Hu DB, Li ZS, Ali I, Xu LJ, Fang NZ. 2017. Effect of potential role of p53 on embryo development arrest induced by H<sub>2</sub>O<sub>2</sub> in mouse. *In Vitro Cell Dev Biol Anim* **53**:344-353. doi:10.1007/s11626-016-0122-1

Huang Y, Yu Y, Gao J, Li R, Zhang C, Zhao H, Zhao Y, Qiao J. 2015. Impaired oocyte quality induced by dehydroepiandrosterone is partially rescued by metformin treatment. *PLOS ONE* **10**:e122370. doi:10.1371/journal.pone.0122370

Johnson D, Gottanka J, Flugel C, Hoffmann F, Futa R, Lutjen-Drecoll E. 1997. Ultrastructural changes in the trabecular meshwork of human eyes treated with corticosteroids. *Arch Ophthalmol* **115**:375-383. doi:10.1001/archophth.1997.01100150377011

Johnson DH, Bradley JM, Acott TS. 1990. The effect of dexamethasone on glycosaminoglycans of human trabecular meshwork in perfusion organ culture. *Invest Ophthalmol Vis Sci* **31**:2568-2571.

Johnstone M, Xin C, Tan J, Martin E, Wen J, Wang RK. 2021. Aqueous outflow regulation - 21st century concepts. *PROG RETIN EYE RES* **83**:100917. doi:10.1016/j.preteyeres.2020.100917

Last JA, Pan T, Ding Y, Reilly CM, Keller K, Acott TS, Fautsch MP, Murphy CJ, Russell P. 2011. Elastic modulus determination of normal and glaucomatous human trabecular meshwork. *Invest Ophthalmol Vis Sci* **52**:2147-2152. doi:10.1167/iovs.10-6342

Li G, Lee C, Agrahari V, Wang K, Navarro I, Sherwood JM, Crews K, Farsiu S, Gonzalez P, Lin CW, Mitra AK, Ethier CR, Stamer WD. 2019. In vivo measurement of trabecular meshwork stiffness in a corticosteroid-induced ocular hypertensive mouse model. *Proc Natl Acad Sci U S A* **116**:1714-1722. doi:10.1073/pnas.1814889116

Li G, Lee C, Read AT, Wang K, Ha J, Kuhn M, Navarro I, Cui J, Young K, Gorijavolu R, Sulchek T, Kopczynski C, Farsiu S, Samples J, Challa P, Ethier CR, Stamer WD. 2021. Anti-fibrotic activity of a rho-kinase inhibitor restores outflow function and intraocular pressure homeostasis. *ELIFE* **10**doi:10.7554/eLife.60831

Li WD, Zang CJ, Yin S, Shen W, Sun QY, Zhao M. 2020. Metformin protects against mouse oocyte apoptosis defects induced by arecoline. *Cell Prolif* **53**:e12809. doi:10.1111/cpr.12809

Lin CW, Sherman B, Moore LA, Laethem CL, Lu DW, Pattabiraman PP, Rao PV, DeLong MA, Kopczynski CC. 2018. Discovery and Preclinical Development of Netarsudil, a Novel Ocular Hypotensive Agent for the Treatment of Glaucoma. *J Ocul Pharmacol Ther* **34**:40-51. doi:10.1089/jop.2017.0023

Lin HC, Stein JD, Nan B, Childers D, Newman-Casey PA, Thompson DA, Richards JE. 2015. Association of Geroprotective Effects of Metformin and Risk of Open-Angle Glaucoma in Persons With Diabetes Mellitus. *JAMA OPHTHALMOL* **133**:915-923. doi:10.1001/jamaophthalmol.2015.1440

Liu Z, Li S, Qian X, Li L, Zhang H, Liu Z. 2021. RhoA/ROCK-YAP/TAZ Axis Regulates the Fibrotic Activity in Dexamethasone-Treated Human Trabecular Meshwork Cells. *Front Mol Biosci* **8**:728932. doi:10.3389/fmolb.2021.728932

Louden ED, Luzzo KM, Jimenez PT, Chi T, Chi M, Moley KH. 2014. TallyHO obese female mice experience poor reproductive outcomes and abnormal blastocyst metabolism that is reversed by metformin. *Reprod Fertil Dev* **27**:31-39. doi:10.1071/RD14339

Maleskic S, Kusturica J, Gusic E, Rakanovic-Todic M, Secic D, Burnazovic-Ristic L, Kulo A. 2017. Metformin use associated with protective effects for ocular complications in patients with type 2 diabetes - observational study. *Acta Med Acad* **46**:116-123. doi:10.5644/ama2006-124.196

McMurtry IF, Abe K, Ota H, Fagan KA, Oka M. 2010. Rho kinase-mediated vasoconstriction in pulmonary hypertension. *ADV EXP MED BIOL* **661**:299-308. doi:10.1007/978-1-60761-500-2\_19

Nakajima E, Nakajima T, Minagawa Y, Shearer TR, Azuma M. 2005. Contribution of ROCK in contraction of trabecular meshwork: proposed mechanism for regulating aqueous outflow in monkey and human eyes. *J Pharm Sci* **94**:701-708. doi:10.1002/jps.20285

Pattabiraman PP, Rao PV. 2010. Mechanistic basis of Rho GTPase-induced extracellular matrix synthesis in trabecular meshwork cells. *Am J Physiol Cell Physiol* **298**:C749-C763. doi:10.1152/ajpcell.00317.2009

Rangarajan S, Bone NB, Zmijewska AA, Jiang S, Park DW, Bernard K, Locy ML, Ravi S, Deshane J, Mannon RB, Abraham E, Darley-USmar V, Thannickal VJ, Zmijewski JW. 2018. Metformin reverses established lung fibrosis in a bleomycin model. *NAT MED* **24**:1121-1127. doi:10.1038/s41591-018-0087-6

Rangarajan S, Bone NB, Zmijewska AA, Jiang S, Park DW, Bernard K, Locy ML, Ravi S, Deshane J, Mannon RB, Abraham E, Darley-USmar V, Thannickal VJ, Zmijewski JW. 2018. Metformin reverses established lung fibrosis in a bleomycin model. *NAT MED* **24**:1121-1127. doi:10.1038/s41591-018-0087-6

Rao PV, Deng PF, Kumar J, Epstein DL. 2001. Modulation of aqueous humor outflow facility by the Rho kinase-specific inhibitor Y-27632. *Invest Ophthalmol Vis Sci* **42**:1029-1037.



491 Rao PV, Deng PF, Kumar J, Epstein DL. 2001. Modulation of aqueous humor outflow facility by the Rho  
492 kinase-specific inhibitor Y-27632. *Invest Ophthalmol Vis Sci* **42**:1029-1037.

493 Ren R, Li G, Le TD, Kopczynski C, Stamer WD, Gong H. 2016. Netarsudil Increases Outflow Facility in  
494 Human Eyes Through Multiple Mechanisms. *Invest Ophthalmol Vis Sci* **57**:6197-6209.  
495 doi:10.1167/iovs.16-20189

496 Richter GM, Coleman AL. 2016. Minimally invasive glaucoma surgery: current status and future  
497 prospects. *Clin Ophthalmol* **10**:189-206. doi:10.2147/OPTH.S80490

498 Sacca SC, Gandolfi S, Bagnis A, Manni G, Damonte G, Traverso CE, Izzotti A. 2016. The Outflow  
499 Pathway: A Tissue With Morphological and Functional Unity. *J CELL PHYSIOL* **231**:1876-1893.  
500 doi:10.1002/jcp.25305

501 Tan J, Wang X, Cai S, He F, Zhang D, Li D, Zhu X, Zhou L, Fan N, Liu X. 2020. C3  
502 Transferase-Expressing scAAV2 Transduces Ocular Anterior Segment Tissues and Lowers Intraocular  
503 Pressure in Mouse and Monkey. *Mol Ther Methods Clin Dev* **17**:143-155.  
504 doi:10.1016/j.omtm.2019.11.017

505 Tang TH, Chang CT, Wang HJ, Erickson JD, Reichard RA, Martin AG, Shannon EK, Martin AL, Huang  
506 YW, Aronstam RS. 2013. Oxidative stress disruption of receptor-mediated calcium signaling  
507 mechanisms. *J BIOMED SCI* **20**:48. doi:10.1186/1423-0127-20-48

508 Wang K, Li G, Read AT, Navarro I, Mitra AK, Stamer WD, Sulchek T, Ethier CR. 2018. The relationship  
509 between outflow resistance and trabecular meshwork stiffness in mice. *Sci Rep* **8**:5848.  
510 doi:10.1038/s41598-018-24165-w

511 Wang Q, Chen G, Zhang Q, Wang M, Wang G, Hu T. 2021. Microcystin-leucine arginine blocks  
512 vasculogenesis and angiogenesis through impairing cytoskeleton and impeding endothelial cell  
513 migration by downregulating integrin-mediated Rho/ROCK signaling pathway. *Environ Sci Pollut Res*  
514 *Int* **28**:67108-67119. doi:10.1007/s11356-021-15337-9

515 Wu A, Khawaja AP, Pasquale LR, Stein JD. 2020. A review of systemic medications that may modulate  
516 the risk of glaucoma. *Eye (Lond)* **34**:12-28. doi:10.1038/s41433-019-0603-z

517 Wu A, Khawaja AP, Pasquale LR, Stein JD. 2020. A review of systemic medications that may modulate  
518 the risk of glaucoma. *Eye (Lond)* **34**:12-28. doi:10.1038/s41433-019-0603-z

519 Xu LJ, Rong SS, Xu YS, Zheng LB, Qiu WY, Zhang X, Jiang LJ, Duan RP, Tian T, Yao YF. 2020.  
520 Anti-fibrosis potential of pirarubicin via inducing apoptotic and autophagic cell death in rabbit  
521 conjunctiva. *EXP EYE RES* **200**:108215. doi:10.1016/j.exer.2020.108215

522 Yemanyi F, Baidouri H, Burns AR, Raghunathan V. 2020. Dexamethasone and Glucocorticoid-Induced  
523 Matrix Temporally Modulate Key Integrins, Caveolins, Contractility, and Stiffness in Human Trabecular  
524 Meshwork Cells. *Invest Ophthalmol Vis Sci* **61**:16. doi:10.1167/iovs.61.13.16

525 Yi H, Huang C, Shi Y, Cao Q, Chen J, Chen XM, Pollock CA. 2021. Metformin Attenuates Renal  
526 Fibrosis in a Mouse Model of Adenine-Induced Renal Injury Through Inhibiting TGF-beta1 Signaling  
527 Pathways. *Front Cell Dev Biol* **9**:603802. doi:10.3389/fcell.2021.603802

528 Zhao Q, Song W, Huang J, Wang D, Xu C. 2021. Metformin decreased myocardial fibrosis and apoptosis  
529 in hyperhomocysteinemia-induced cardiac hypertrophy. *CURR RES TRANSL MED* **69**:103270.  
530 doi:10.1016/j.retram.2020.103270

531 Zhao Q, Song W, Huang J, Wang D, Xu C. 2021. Metformin decreased myocardial fibrosis and apoptosis  
532 in hyperhomocysteinemia-induced cardiac hypertrophy. *CURR RES TRANSL MED* **69**:103270.  
533 doi:10.1016/j.retram.2020.103270

534 Zode GS, Sharma AB, Lin X, Searby CC, Bugge K, Kim GH, Clark AF, Sheffield VC. 2014.

535 Ocular-specific ER stress reduction rescues glaucoma in murine glucocorticoid-induced glaucoma. *J*  
536 *CLIN INVEST* **124**:1956-1965. doi:10.1172/JCI69774  
537

## Figure legends

**Figure 1.** Topical ocular DEX induced OHT in mice. A. Elevated IOP in DEX-treated C57BL/6J mice was induced significantly at 3 weeks ( $p < 0.01$ ). B. There was no significant change in the body weight of the DEX-treated group ( $p > 0.05$ ). C. HE staining of OHT models. D.  $\alpha$ -SMA and TGF- $\beta$  staining in the representative OHT models. E-F. Quantification of  $\alpha$ -SMA and TGF- $\beta$  of the models.  $*p < 0.05$ , ns: non-significance, TM: trabecular meshwork, SC: Schlemm's canal, CB: ciliary body.

**Figure 2.** Effect of metformin (MET) on OHT mice model. A. Experimental process overview. B. MET effectively reversed the IOP in steroid-induced OHT mice models.  $*p < 0.05$ ,  $**p < 0.01$ , ns: non-significance.

**Figure 3.** MET decreased the expression of fibrotic markers in steroid-induced trabecular meshwork stiffening in mice. A-B. Representative images of HE (A) and fibrotic markers (B). C-D. Quantification of  $\alpha$ -SMA of the models after 2 weeks (C) and 3 weeks (D) of MET treatment. E-F. Quantification of TGF- $\beta$  of the models after 2 weeks (E) and 3 weeks (F) of MET treatment. G-H. Quantification of F-actin of the models after 2 weeks (G) and 3 weeks (H) of MET treatment. I-J. Quantification of fibronectin (FN) of the models after 2 weeks (I) and 3 weeks (J) of MET treatment.  $*p < 0.05$ ,  $**p < 0.01$ , ns: non-significance. White arrows indicate the representative positive cells.

**Figure 4.** Low dose of metformin reversed the disarranged morphology of HTMC. A. HTMC were treated with metformin for 24 h with or without pre-treatment of tBHP for 1 h. Representative images of cell distribution and morphology photographed by inverted microscopy. B. The expression of myocilin after DEX treatment in HTMC. C-D. The relative HTMC viability after exposure to MET with different concentrations. Cell proliferation was measured using the CCK8 assay. E-F. The relative ROS levels were assayed via FCM and the results showed that metformin reduced the ROS production of HTMC induced by tBHP.  $**p < 0.01$ .  $*p < 0.05$ .

**Figure 5.** Metformin promoted the recovery of tBHP-induced cytoskeleton damages

(A) and activated integrin/ROCK pathway (B) in HTMC. C. The quantitative protein levels of B. \*  $p < 0.05$  (comparison with the control), #  $p < 0.05$  (comparison with the tBHP treated group).

**Figure 6.** Metformin partially normalized the damaged microfilaments of HTMC induced by tBHP. Red arrows indicate the representative microfilaments imaged by TEM.

**Figure 1.**

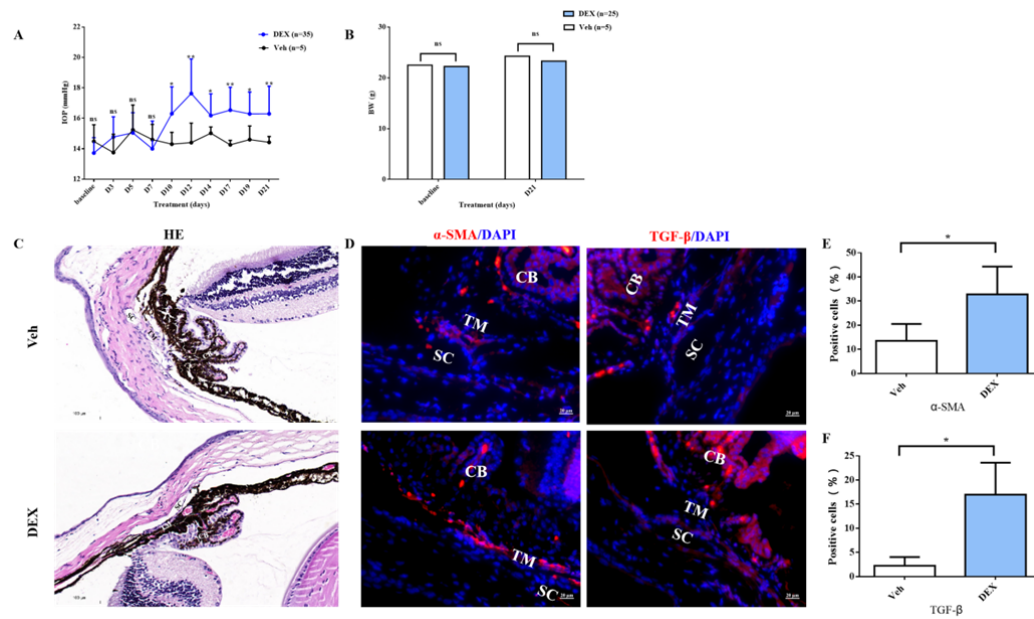

**Figure 2.**

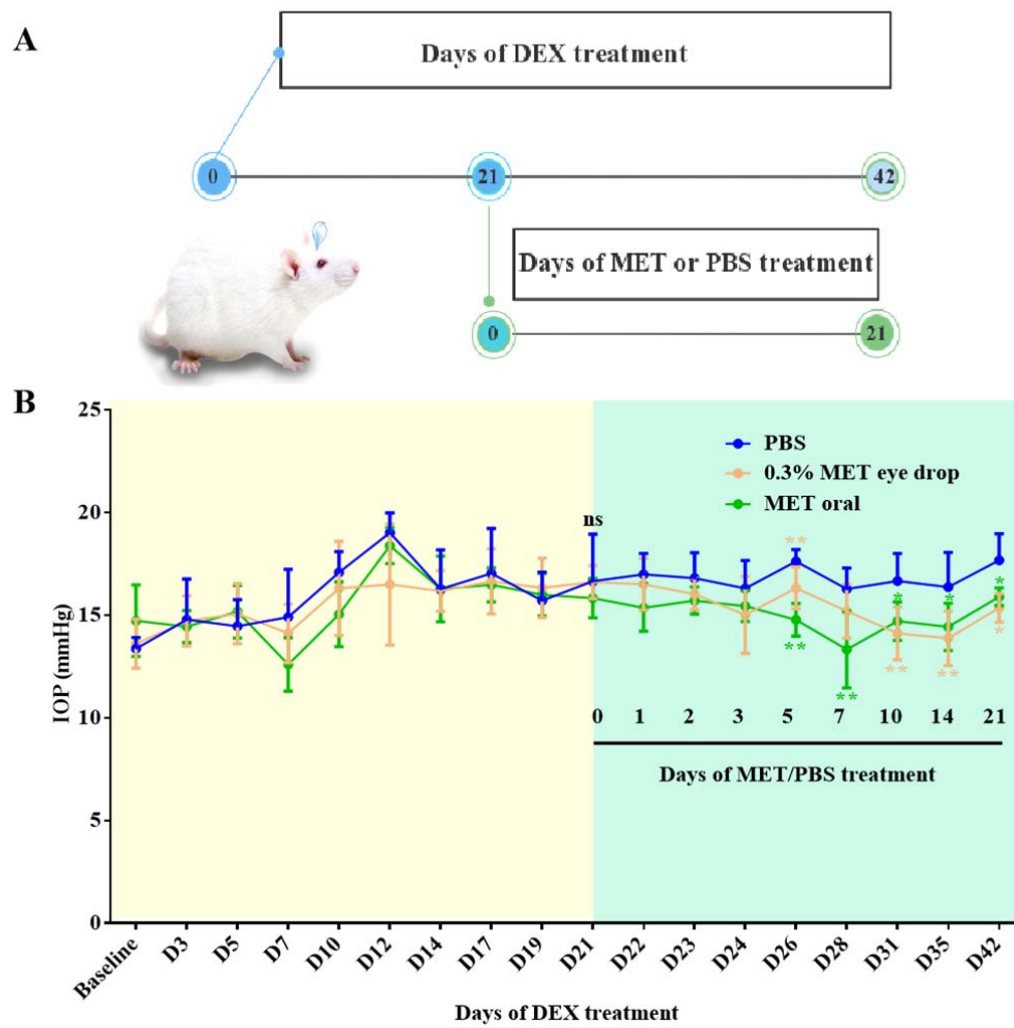

**Figure 3.**

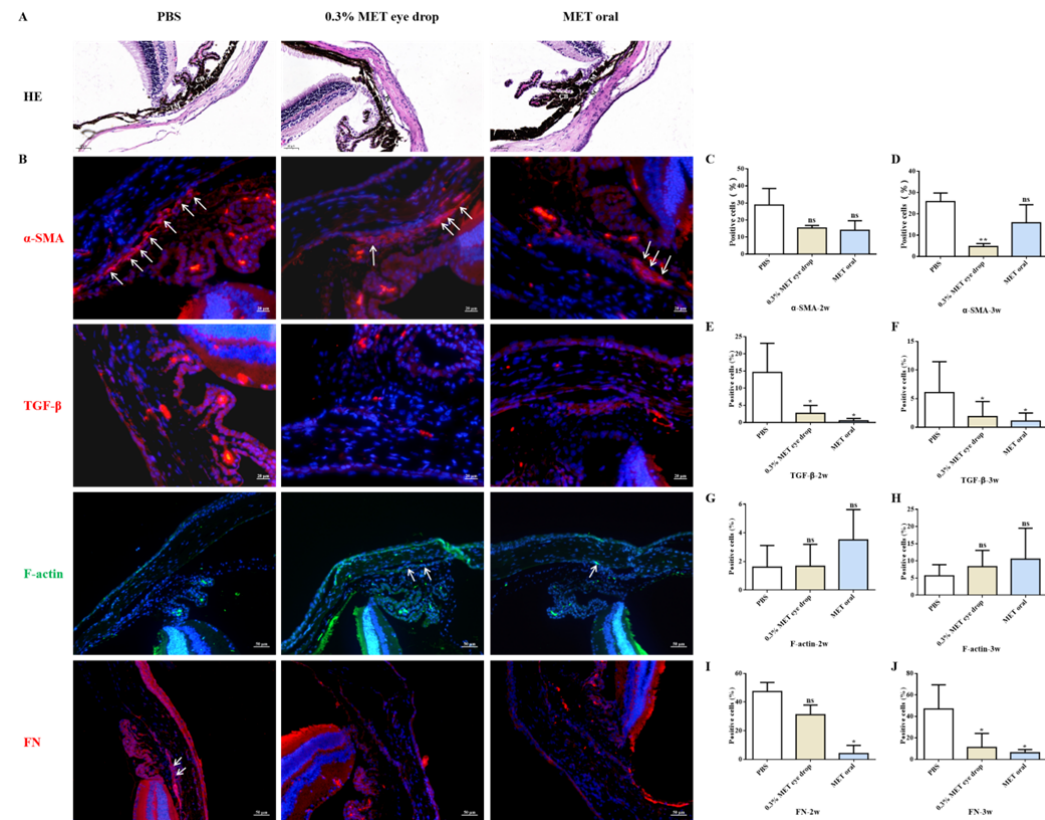



**Figure 4.**

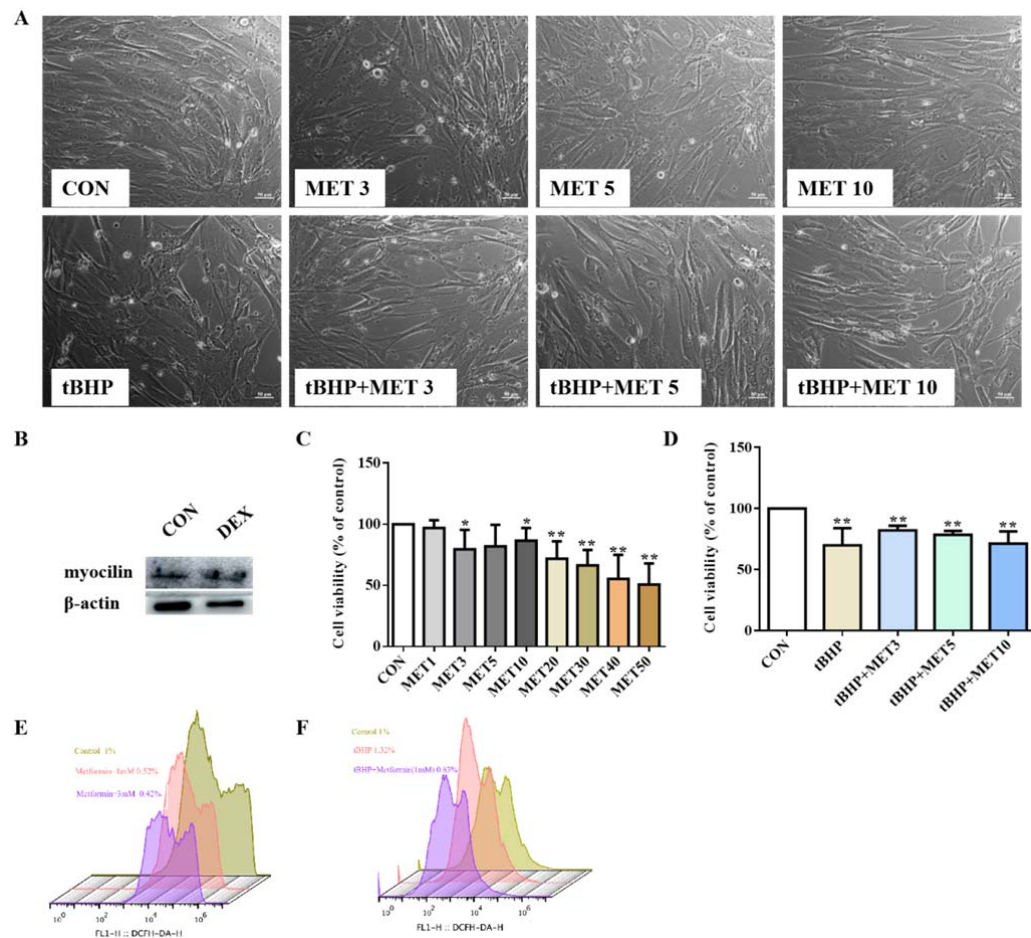

**Figure 5.**

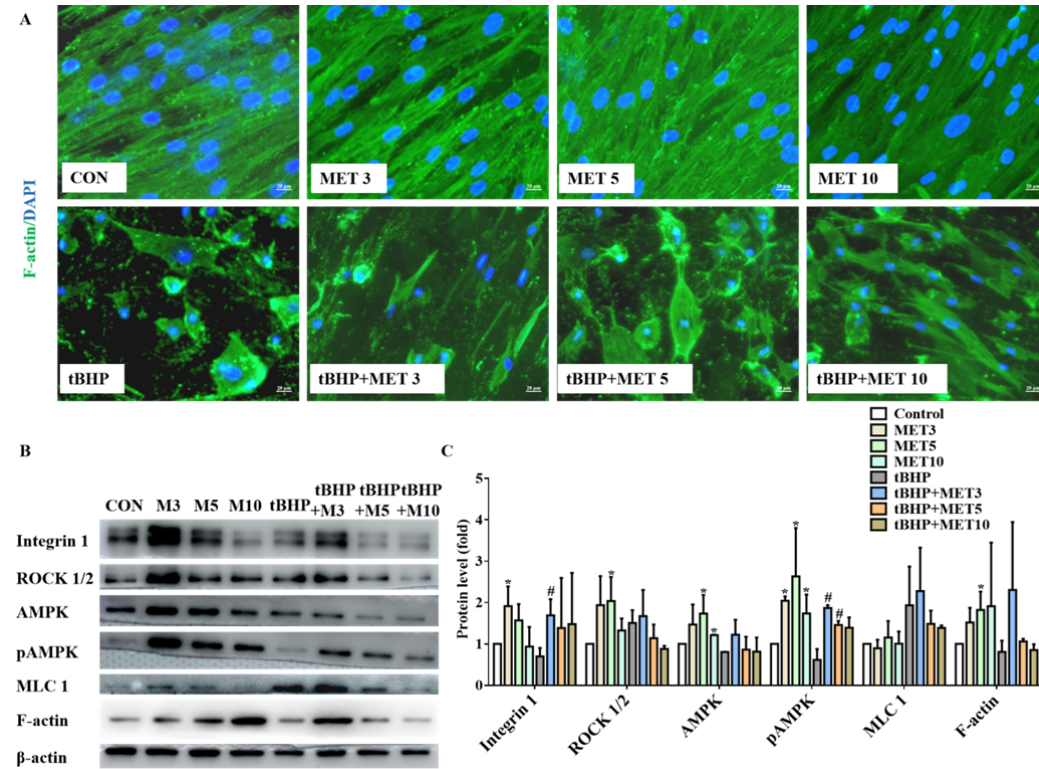



**Figure 6.**

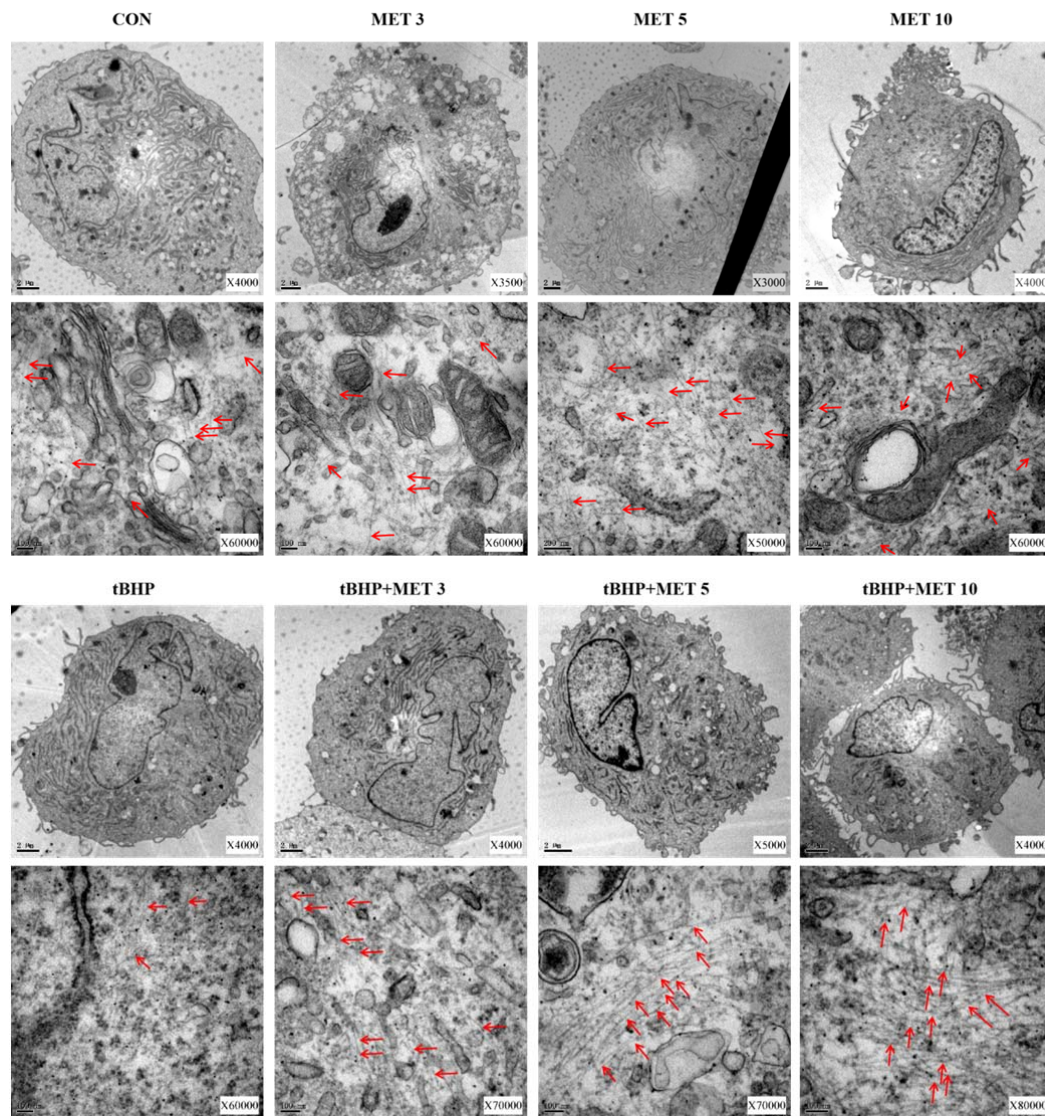

Source: http://biorxiv.org/content/10.1101/2022.06.30.498232v1.full.pdf
